# Supplementary material
Source: publisher figshare collection journal article supplement (https://frontiersin.figshare.com/ndownloader/files/25209785)
Supplement: Supplementary file 1 [file 25209785]

Supplementary Material

**Table S1** Number and percentage of traps for each bait type, by lobster fishing season, fishing boat, and bay. Data presented correspond to the alternative bait trial study performed during the 2019 lobster fishing seasons in Prince Edward Island, Canada

|  | **Traditional bait** | **Alternative bait** | **Total** | |
| --- | --- | --- | --- | --- |
| Variable | n = 2,127 | n = 2,125 | n = 4,252 | % |
| Season |  |  |  |  |
| Spring | 1,545 | 1,543 | 3,088 | 72.6 |
| Fall | 582 | 582 | 1,164 | 27.4 |
| Boat |  |  |  |  |
| A | 216 | 216 | 432 | 10.2 |
| B | 143 | 143 | 286 | 6.7 |
| C | 179 | 177 | 356 | 8.4 |
| D | 176 | 176 | 352 | 8.3 |
| E | 204 | 204 | 408 | 9.6 |
| F | 215 | 215 | 430 | 10.1 |
| G | 174 | 174 | 348 | 8.2 |
| H | 142 | 143 | 285 | 6.7 |
| I | 204 | 204 | 408 | 9.6 |
| J | 181 | 179 | 360 | 8.5 |
| K | 173 | 174 | 347 | 8.2 |
| L | 120 | 120 | 240 | 5.6 |
| Bay |  |  |  |  |
| Cove Head | 173 | 174 | 347 | 8.2 |
| North Rustico | 215 | 215 | 430 | 10.1 |
| Tracadie | 216 | 216 | 432 | 10.2 |
| Nine Mile Creek | 798 | 795 | 1,593 | 37.5 |
| Victoria | 143 | 143 | 286 | 6.7 |
| Abram Village | 174 | 174 | 348 | 8.2 |
| Skinner's Pond | 204 | 204 | 408 | 9.6 |
| Summerside | 204 | 204 | 408 | 9.6 |


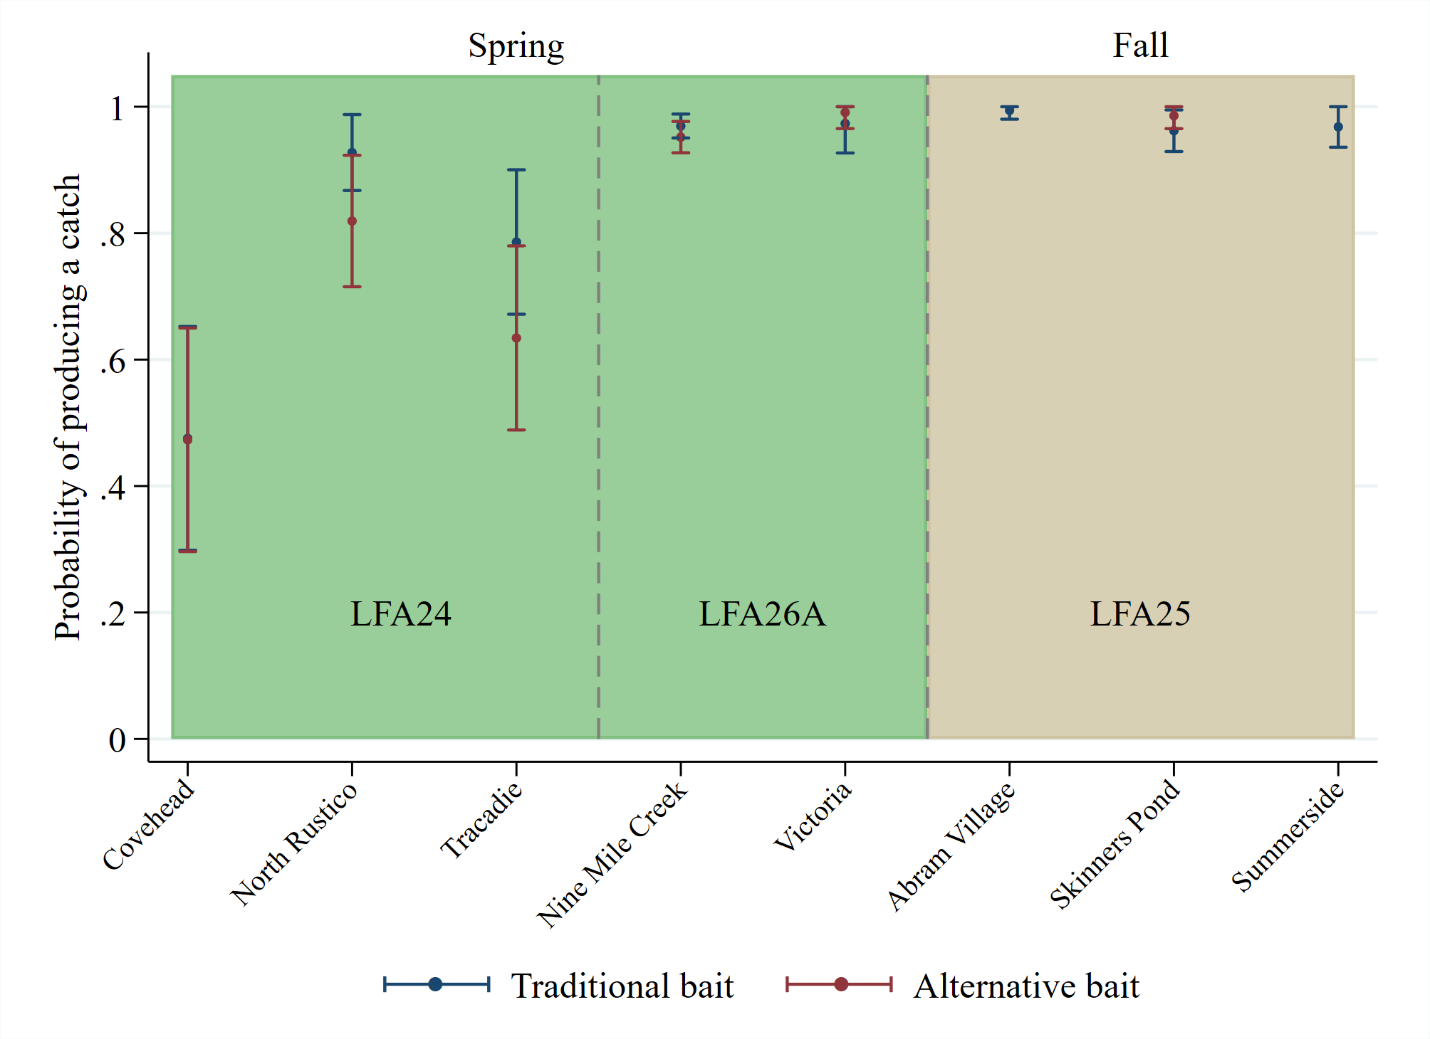


**Figure S1** Predicted probability of producing a catch for the traditional and alternative lobster baits and 95% confidence intervals by bays in spring and fall of 2019 lobster fishing seasons in Prince Edward Island, Canada. Note that the analyses were done separately for spring (green) and fall seasons (brown). Gray dashed lines separate different lobster fishing areas (LFAs).
